# Supplementary material for: Sequence and structure analyses of lytic polysaccharide monooxygenases mined from metagenomic DNA of humus samples around white-rot fungi in Cuc Phuong tropical forest, Vietnam
Source: PeerJ journal article supplement (doi:10.7717/peerj.17553), 2024-06-24
Supplement: Supplemental_Article_S1.pdf [file Supplemental_Article_S1.pdf]

## Supplemental Article S1. Comparison of 31 putative LPMOs

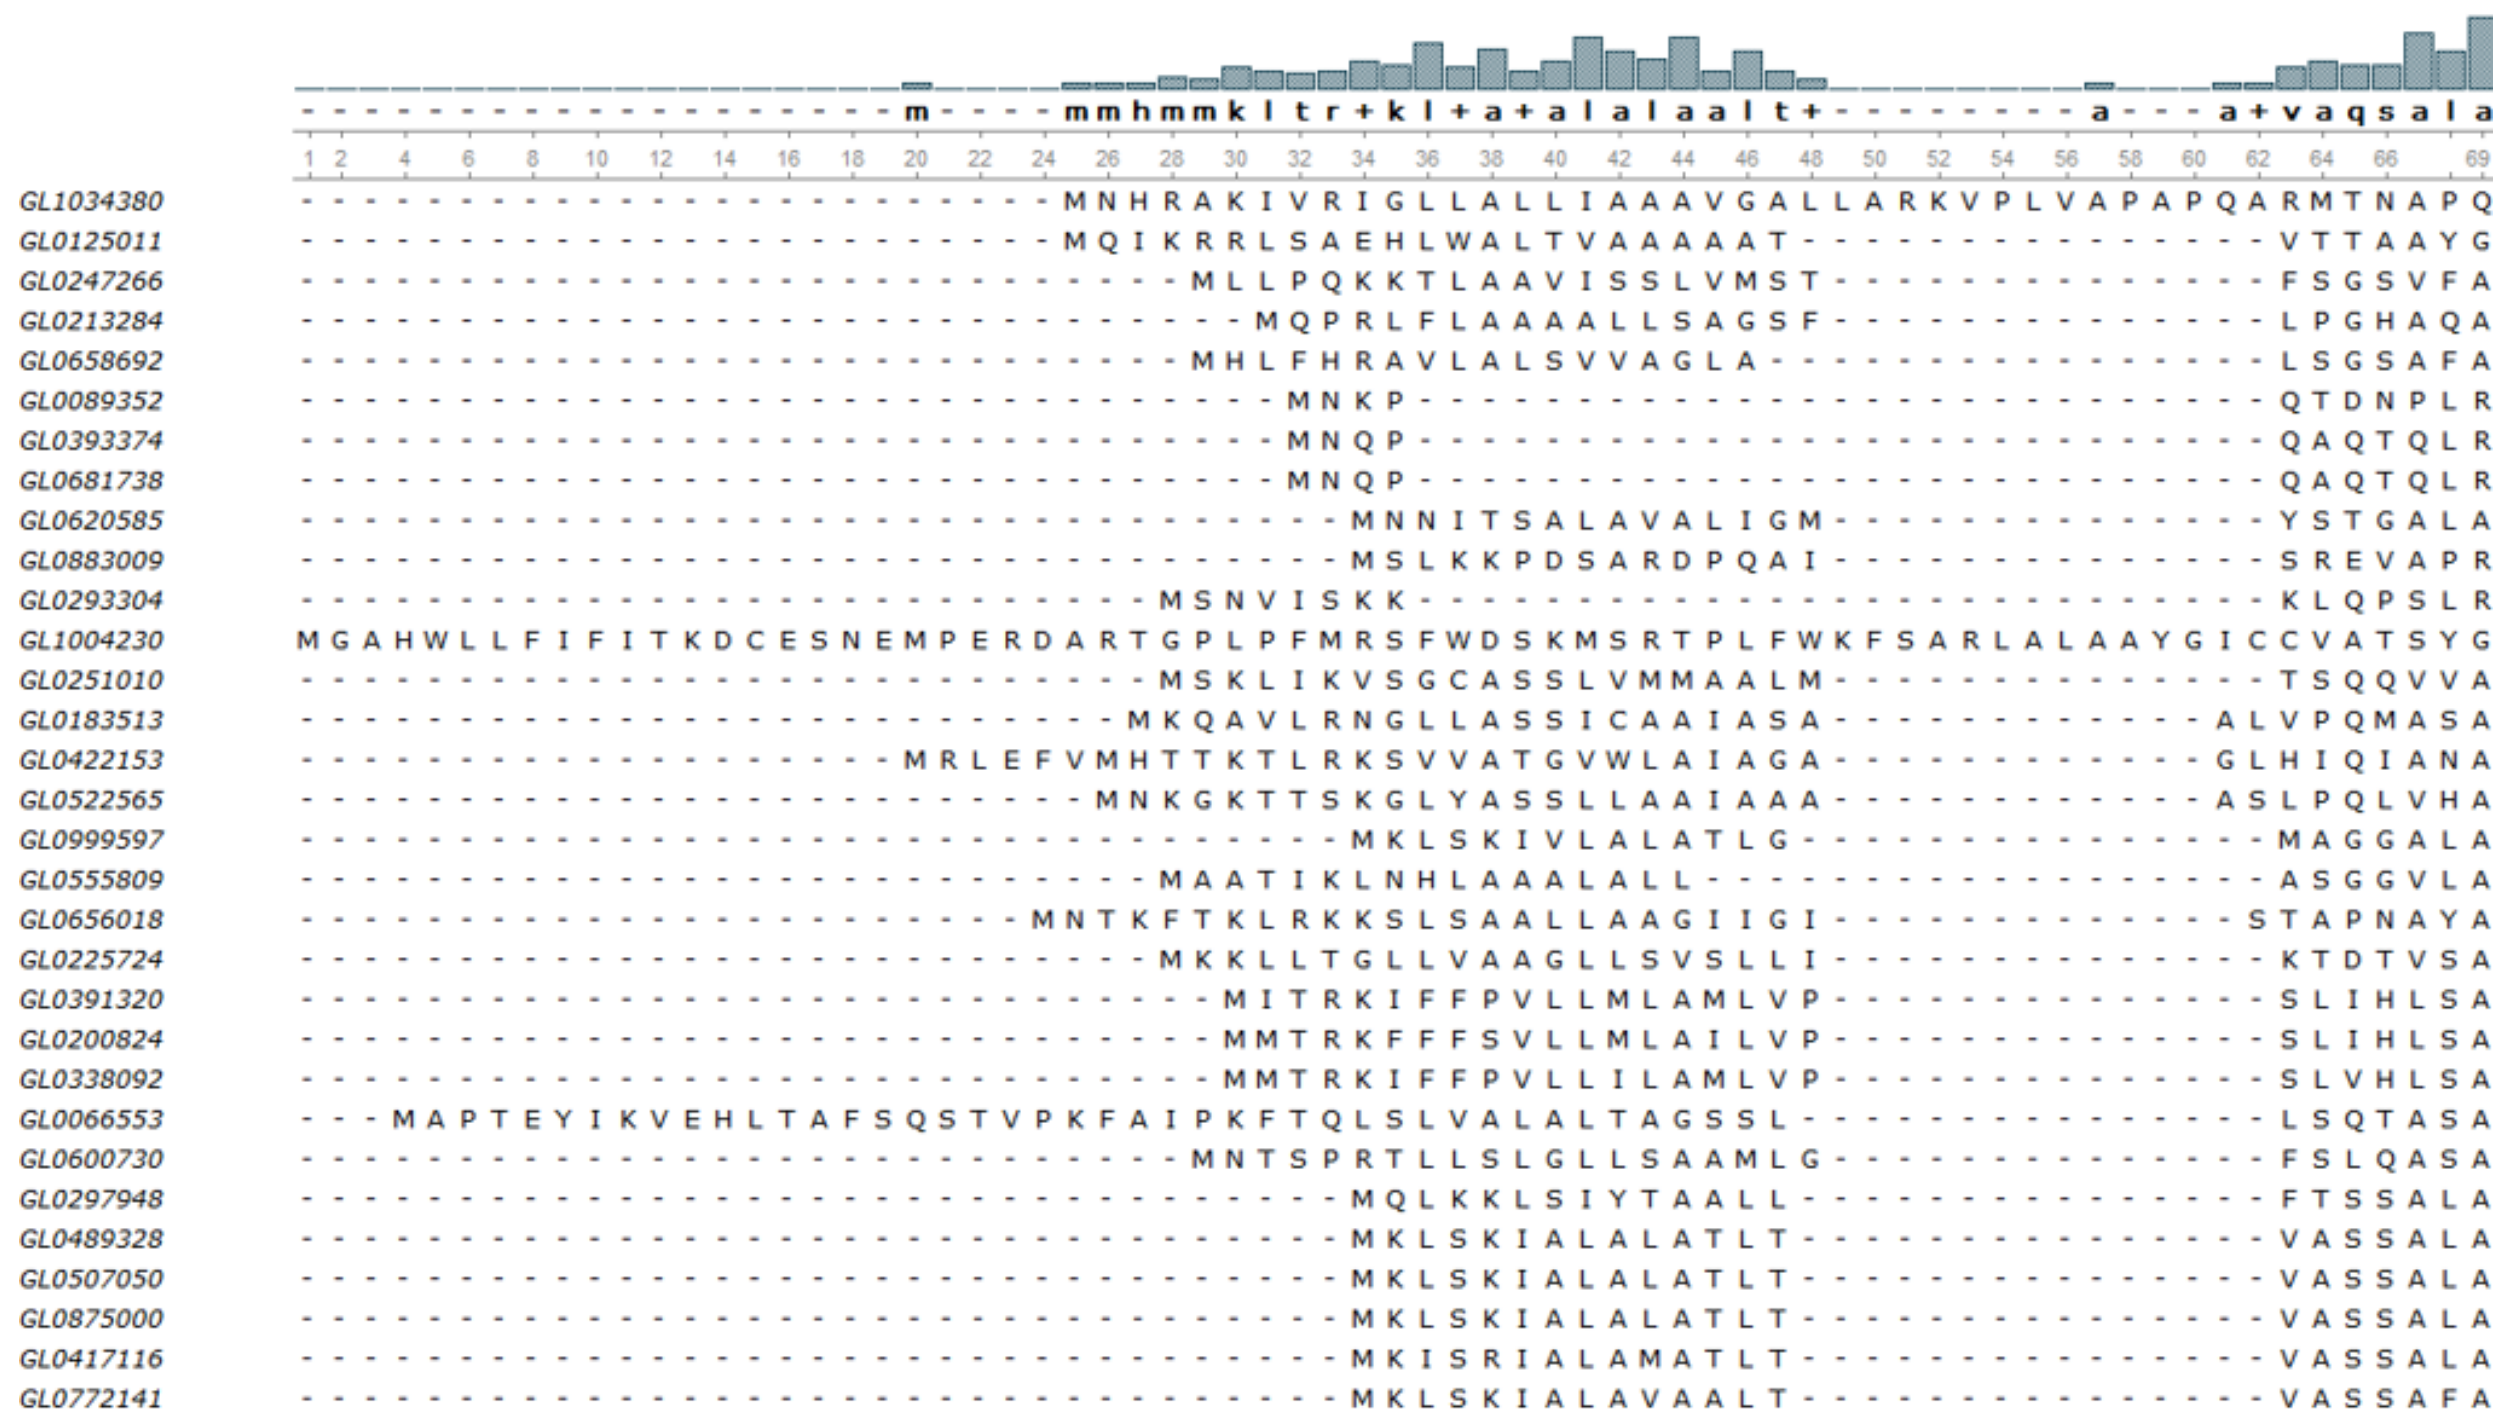

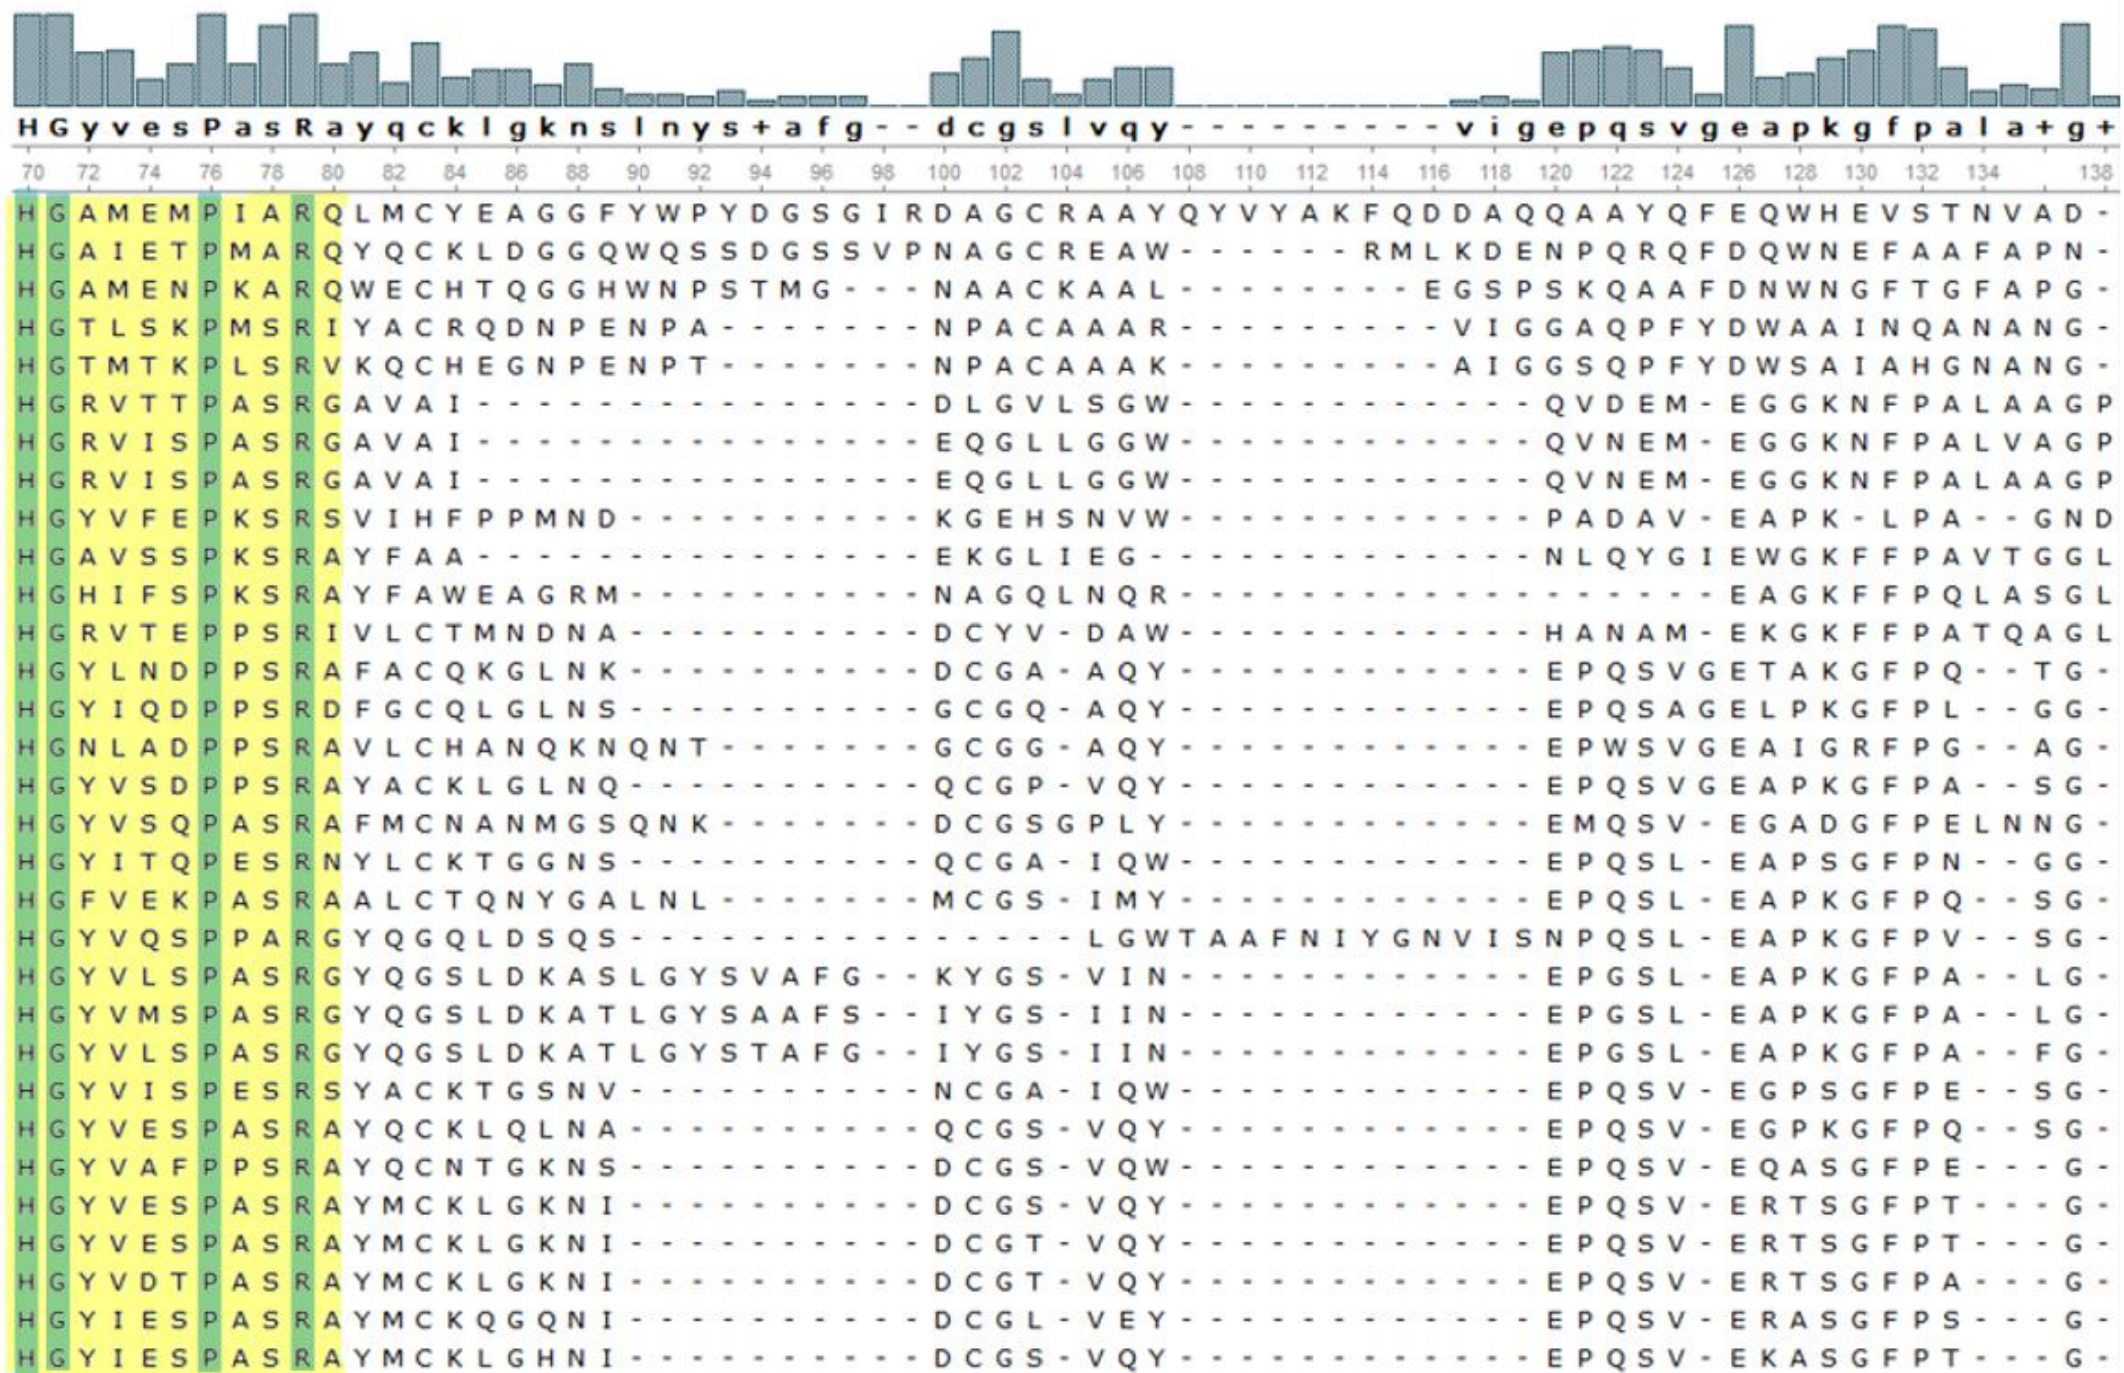

Region extracted to Figure 2

Motif Y[W]E[N]PQSV[L]E



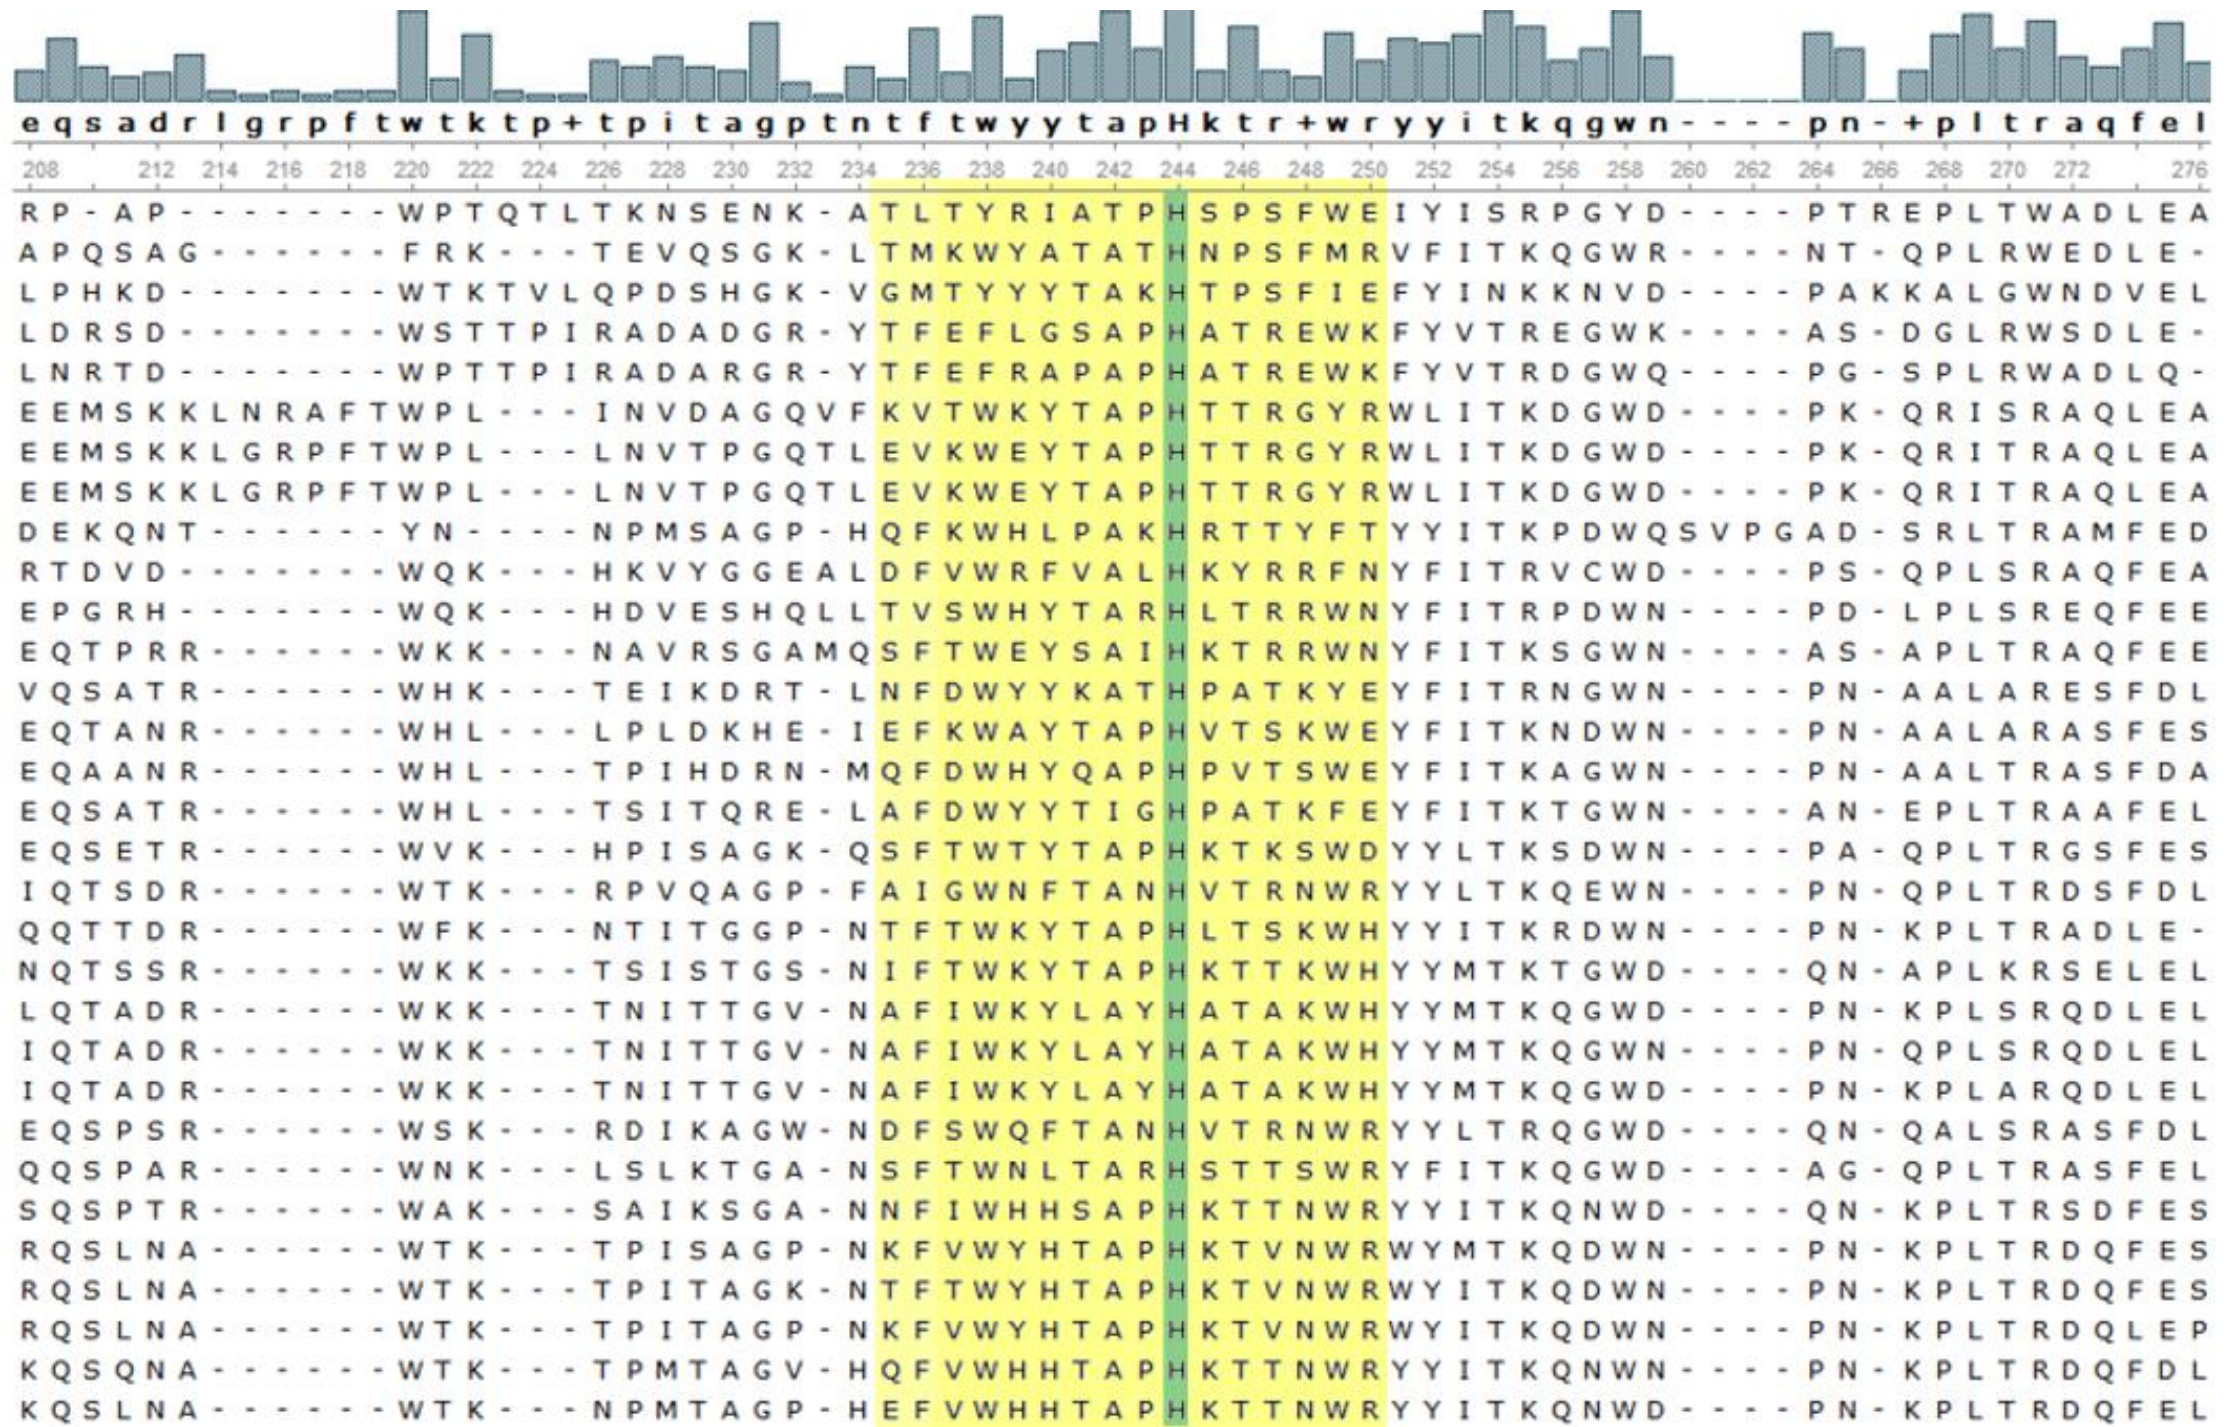

Region extracted to Figure 2

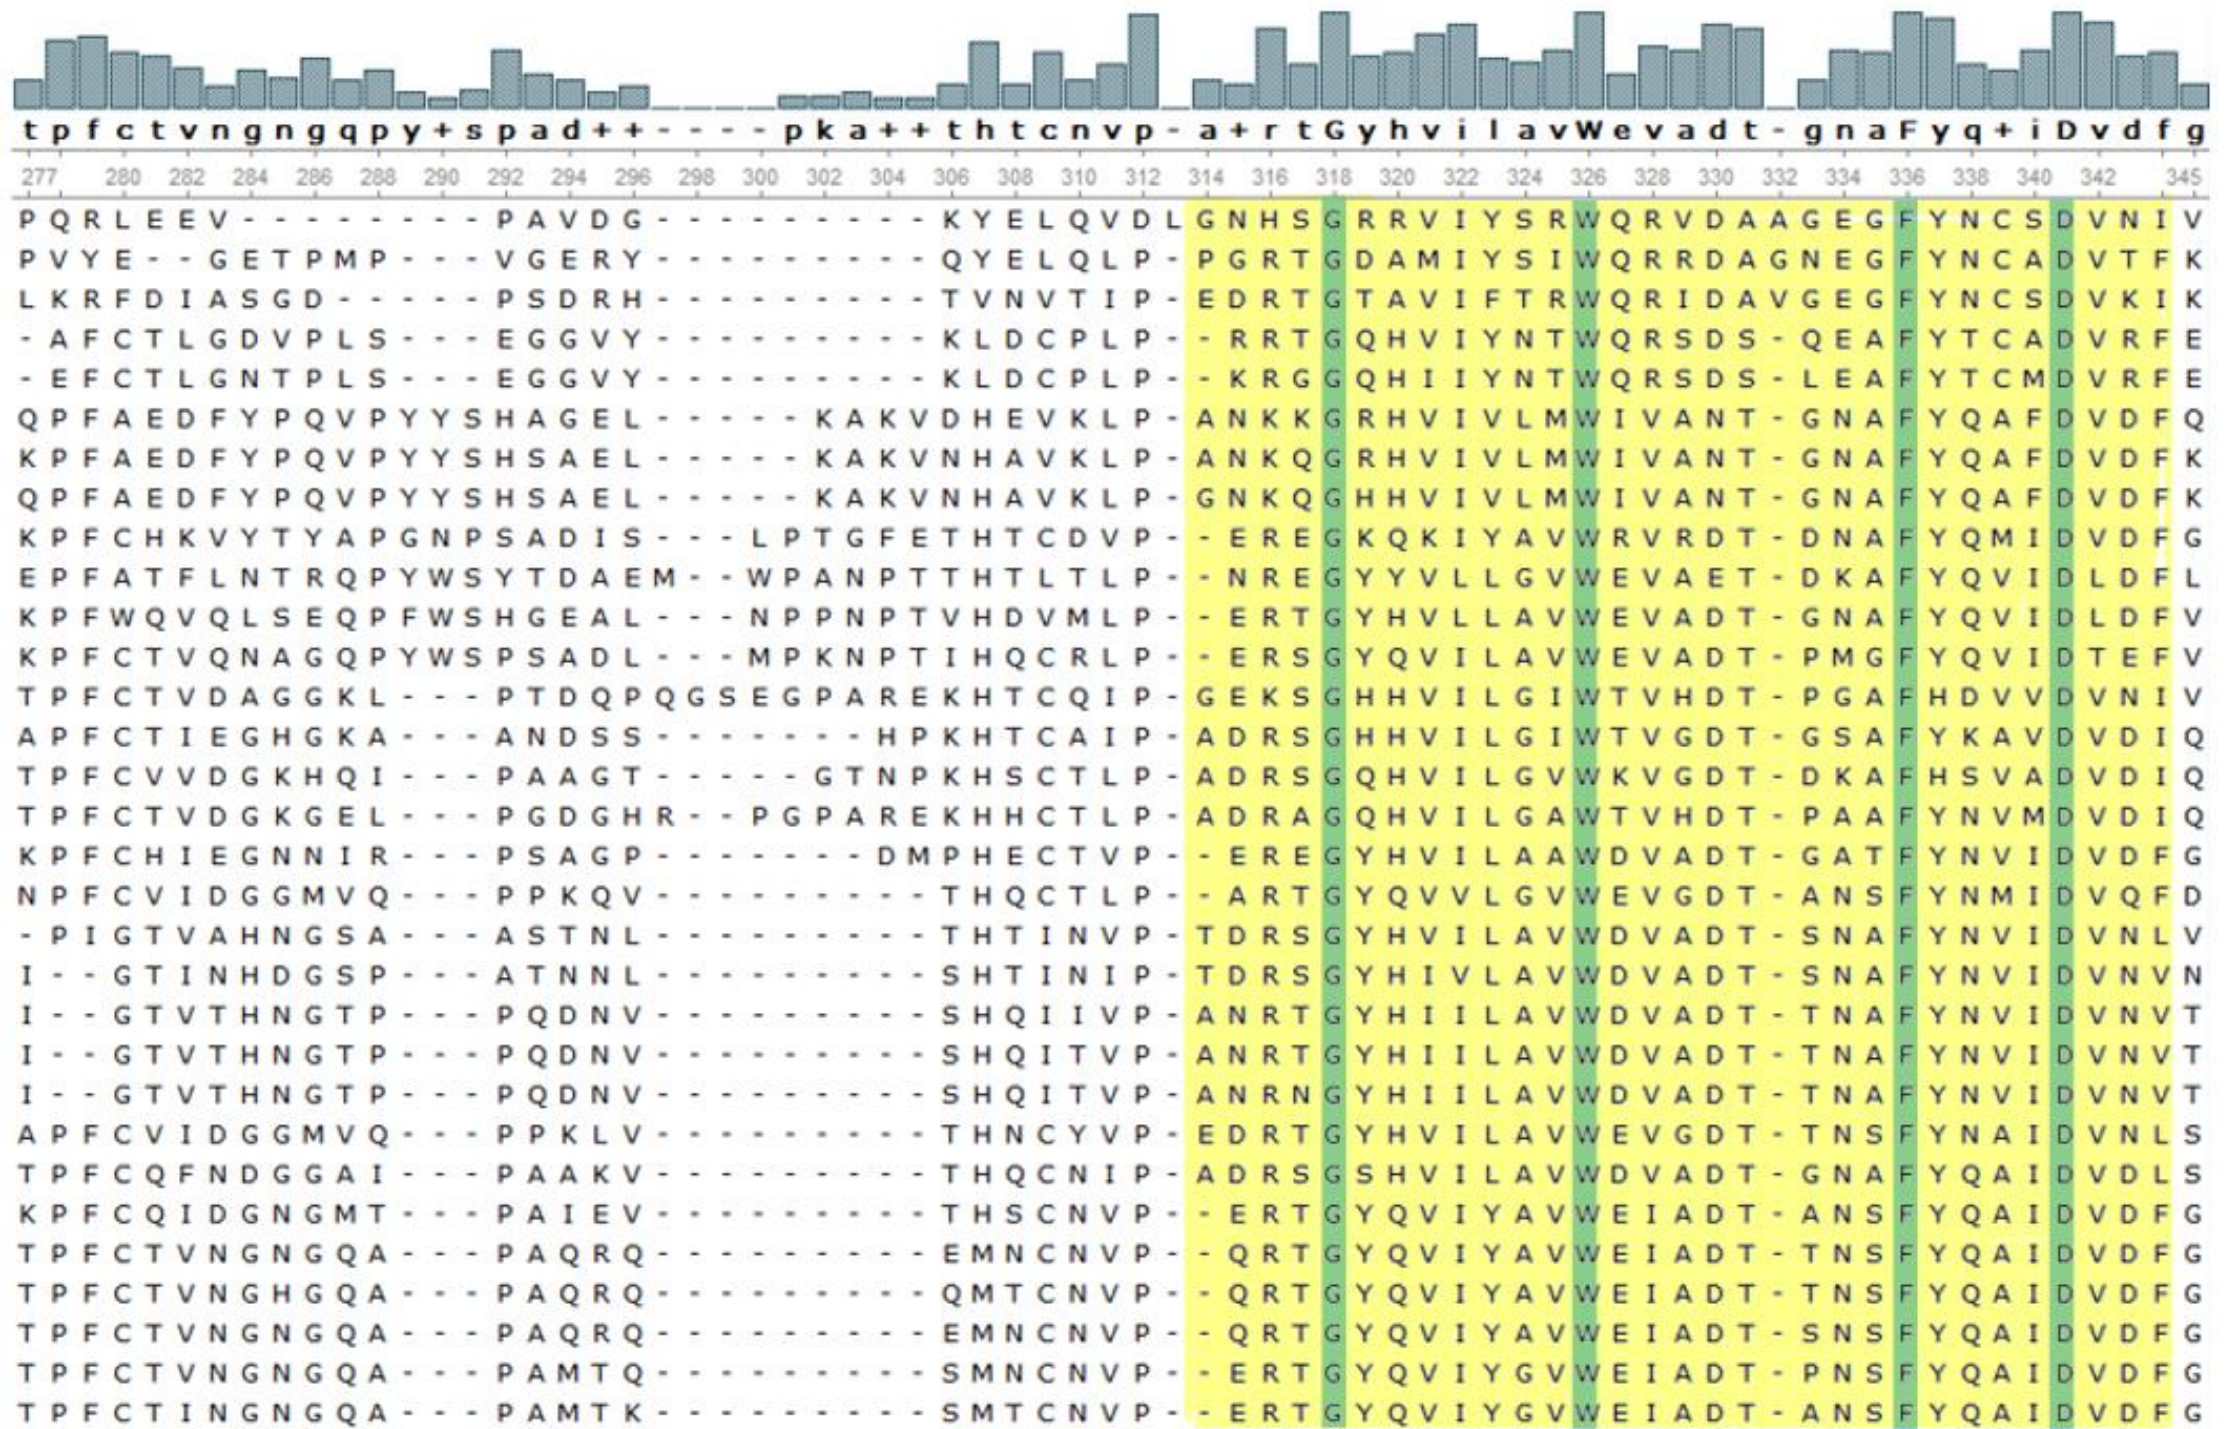

Region extracted to Figure 2





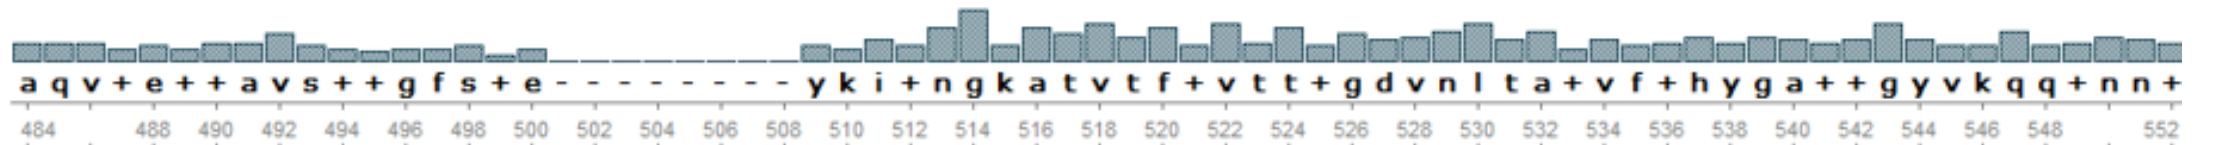

|                  |                                                                                                                                           |
|------------------|-------------------------------------------------------------------------------------------------------------------------------------------|
| <i>GL1034380</i> | - - - - -                                                                                                                                 |
| <i>GL0125011</i> | D P V A P P Q A K I S G P S T V K - - - - - A G E T I T L T N E G T N N T T G Q H Y R Y D W H A H G F T P M N G T A S                     |
| <i>GL0247266</i> | A I S L D R Y T L A P I A T T T S G Y S Y A V T G S S D K S G V T W Q W K N V A G D G R I T A S P A N Q A K T Q I T V P G G V P A G T T A |
| <i>GL0213284</i> | - - - - - V Y L R P G H R F Q L D T K V P D P V D P V D P P                                                                               |
| <i>GL0658692</i> | - - - - - N R V Y L K P G N R F Q L E T Q V P G P V D P V D P P                                                                           |
| <i>GL0089352</i> | - - - - -                                                                                                                                 |
| <i>GL0393374</i> | - - - - -                                                                                                                                 |
| <i>GL0681738</i> | - - - - -                                                                                                                                 |
| <i>GL0620585</i> | N A E K Y Q W T I V S G Q D I G A - - - - - L Q V A N G G E W V S T V H A A K A R A L I K P G K I G K V T Y R L T V T A K N G K T S       |
| <i>GL0883009</i> | G G P I D G F I I Y R D G - - - - - N E V G R V P A S Q R T F T D D N L T P D T R Y R Y T V K A F D A Q G Q L S A S                       |
| <i>GL0293304</i> | V N A L Q G Y I V Y R D G - - - - - N E I S R L P A S Q L S Y L D T N V A P A N S Y R Y F V A A I D V Q G R L S V P                       |
| <i>GL1004230</i> | - - - - -                                                                                                                                 |
| <i>GL0251010</i> | D S - - - G A S L S I Q A F D K T - - - - - V E L V K G R A T L P L T V L G N R T M N I E A T V F D A S H K A V G S A T R V M E P G       |
| <i>GL0183513</i> | P D - - - A Y M H L H D L K S E - - - - - Y V L K D G E A T V G F S V M T N R S L E V T A T L F D A T N K Q V G F Q R Q Q V N S T         |
| <i>GL0422153</i> | G E - - - P T T M H L H D V K P E - - - - - Y T I V D G K G G V D F S V M T N K A L T V T A R L F D S N N K Q V S Y S R Q N V N - G       |
| <i>GL0522565</i> | V D - - - D A Y L H L H G I K P E - - - - - Y V L K D G K G A V D F S V M T N R K L Q V T S Q L F D E H N Q Q V G H A S Q L V D A S       |
| <i>GL0999597</i> | - - - - -                                                                                                                                 |
| <i>GL0555809</i> | P P A S D S I S V S - - G L E S E - - - - - Y L L D N G K V T L A F T V T A E G D L A V T N T L Y D H G G A A K G Q T S A D I K D S       |
| <i>GL0656018</i> | N V A V D H Y V I Y R G S T K E Q - - - - - M T A V G T S T I T S F K D M N L Q S N T S Y I Y A V A A V D V A G N E S I K                 |
| <i>GL0225724</i> | - - - - -                                                                                                                                 |
| <i>GL0391320</i> | T Q G I K N Y Q V F - - - - - E N G I K V G E T V Q T S F S R V G L A Q D T E Y L Y T V R S V A M N D Q I S D M                           |
| <i>GL0200824</i> | S Q G I K N Y Q I F - - - - - E N G I K V G E T M Q T N F L R T G L T Q D T E Y R Y T V K S V A M N D Q L S D A                           |
| <i>GL0338092</i> | S Q G I K N Y H V F - - - - - E N G I K V A E T V Q T T F L R T G L S Q D T E Y N Y T V R S V G M N D Q L S E V                           |
| <i>GL0066553</i> | A P - - - G N Q L N V T S L A D D - - - - - Y T I V D G V A Q V S F D V S T N A D M Q V S A Y L F S H D G T A A G Y V T Q A V N N T       |
| <i>GL0600730</i> | - - - - -                                                                                                                                 |
| <i>GL0297948</i> | E D D T A K E S L S L S N V A A T - - - - - P I E N G K A T V T F N A A A K G E M H L I A V V S D H A G A E K G S L Q Q T I D N R         |
| <i>GL0489328</i> | A Q V S E D I A V T N V Q F S - - - - - K I K S G A A T V T F H V N T Q G N V N L E A R V M N H A G A E K G Y V K Q E M N N A             |
| <i>GL0507050</i> | S Q V S E A I A V T N V K F S - - - - - K I K N G A A T V T F H V N T Q G N V N L E A R V M N H A G A E K G Y V K Q D M N N A             |
| <i>GL0875000</i> | A Q V S E N I A V S N V K F S - - - - - K I A N G N A T V T F H V N T Q G N V N L E A R V M N H A G A E K G Y L K Q D M N N A             |
| <i>GL0417116</i> | A V V N E S I A V T D L H Y S - - - - - K V T H G A A T V T F H V N T Q G D V N L E A H V L N H P G A E K G Y L K Q D M N N S             |
| <i>GL0772141</i> | A E V H E T I A V S N L Q Y S - - - - - N I E N G K A T V T F H V N T K G D V N V E A H V M S H S G A E K G Y L K Q E M N N A             |



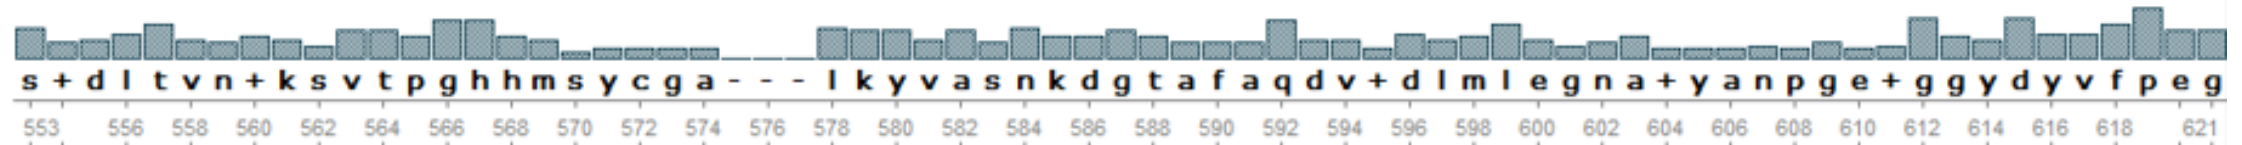

*GL1034380* -----  
*GL0125011* SWSGTAPATPGKAT-----ATLVVTDIEGRTSRATHDITITGEN-----GGGLHPAWPAG  
*GL0247266* TFEELTGKTANGTPGKATLK-----VTVQAPQVAPTPTSIA SDKKGGKFTAKANFDYSQGNVSYSSWSLL  
*GL0213284* -----PGDYDYVYPAG  
*GL0658692* -----GGDFDFVYPAG  
*GL0089352* -----  
*GL0393374* -----  
*GL0681738* -----  
*GL0620585* TDDITVTVKEAQQASDVQINTGNNQDTIVGSDVIAAAVVSKNND SLKGAKIEW S ALNHADKI QISSPNN  
*GL0883009* SNVHDAHTKPK-----EDGGDYRDWKL  
*GL0293304* GNVLTVTTLTQD-----NGGGDDNAEQG  
*GL1004230* -----  
*GL0251010* SATLEIALLSEPGAHQ-----IKLIGSTTDGRTTRQRLESLELTGEGG-----GQAYDAVYPEG  
*GL0183513* TSPFAVQASSVDGEHT-----LKIVGKNAD E E ILLQEDRPLKLM TQ-----DDAAYPTFPEG  
*GL0422153* TEPFALNVVSAEGEHT-----LKVVGV D KRERVLLQDEKTVQLKAAG-----DASHDFVFPES  
*GL0522565* TAPVVLEASSGAGKHL-----LKVVGV D NDKR V VLQEEREVRLLDAG-----NAEHDFVFPQS  
*GL0999597* -----VGGDRVTW-----  
*GL0555809* SHSFTIEVSGLSAGHHQ-----LVIEGKPKAGGAPLQQTL D LMFKDPAS-----GGDYQYSFPEG  
*GL0656018* SSILTVTTK-----EQSTSSEYEQWSP  
*GL0225724* -----  
*GL0391320* SNELKVRTKKITPGNGQTYCGA-----EQYNSANAYPTAGAKV F YACKIWK NKWYANPGELPGTNMVW-EE  
*GL0200824* SNELKIRTKKVTPGNGQSYCGA-----EQYNAANAYPTAGVKV F YSCKIWK NKWYANPGELPGTNMVW-EE  
*GL0338092* SNTLKVRTKKVTPGNGQSYCGA-----EPYNAANAYPIAGVKV F YACKIWK NKWYANPGEVPGTNMVW-EE  
*GL0066553* SASFVLDV V APKAGHY-----HLQVKAEPKQGEVIQQNF D LFLKDQTT-----APDADFI FPEG  
*GL0600730* -----  
*GL0297948* SLPLSIPLTNVQAGHHM-----LRY SASNAQGA I ISQGVINLMLEEKSEPTPAP-AGNYDYTFPDN  
*GL0489328* NQDITMNL S GVTAGHHM-----LKYYATNKDGT LFAQDV V DMMLENDASADTGT-TGKYDYTFPQS  
*GL0507050* NQDVTMNLSDVTPGHM-----LKYYASNKDGV MFAQDV IDMMLEGEASNTDNGTAGNYEFIFPQN  
*GL0875000* NQDVTLNLTDVTPGHM-----LKYYAVNKDGT LFAQDV V DMMLEGEAASGNTGNTGNFDYTFPEN  
*GL0417116* NQDVTMNL TNVTPGHM-----LKYYATNKAGT LFAQDV L DMMLEGEATSGD-----TGKSDFI FPDN  
*GL0772141* NQDVTMTLTDVTAGHHM-----LKYYASNKDGT LFDQDV L NLML ENNAADS-----TGQHDVIFPDG






  
**g k i s r v d - i t p h g l q i - t f - n p - k n s m n i s r l q s g i y f v k i - y k d g - s i t k t i r k**
  
 760      764 766 768 770 772 774 776 778 780 782 784 786 788 790 792 794 796 798 800 802 804 806 808 810      814

|           |                                                                                                               |
|-----------|---------------------------------------------------------------------------------------------------------------|
| GL1034380 | - - - - -                                                                                                     |
| GL0125011 | - - - - -                                                                                                     |
| GL0247266 | P G Q S E L W K Q Q - - - - -                                                                                 |
| GL0213284 | - - - - -                                                                                                     |
| GL0658692 | - - - - -                                                                                                     |
| GL0089352 | - - - - -                                                                                                     |
| GL0393374 | - - - - -                                                                                                     |
| GL0681738 | - - - - -                                                                                                     |
| GL0620585 | - - - - -                                                                                                     |
| GL0883009 | - - - - -                                                                                                     |
| GL0293304 | - - - - -                                                                                                     |
| GL1004230 | - - - - -                                                                                                     |
| GL0251010 | - - - - -                                                                                                     |
| GL0183513 | - - - - -                                                                                                     |
| GL0422153 | - - - - -                                                                                                     |
| GL0522565 | - - - - -                                                                                                     |
| GL0999597 | - - - - -                                                                                                     |
| GL0555809 | - - - - -                                                                                                     |
| GL0656018 | - - - - -                                                                                                     |
| GL0225724 | - - - - -                                                                                                     |
| GL0391320 | G K M S R V D V I N P A G I Q M L S S V N P T K S S I N I S H L Q A G I Y F V R I H Y K D G S S I T K T I R K |
| GL0200824 | G K I S R V D I I T P H G L Q I M T F M N P G Q N S M N I S R L Q S G I Y F V K I Q Y K D G N S I T K T I R K |
| GL0338092 | N T I S R V D L I T P H G L Q I I T F T N P E K N S M N I S R L Q S G T Y F V K I L Y K D G R S I T K T I R K |
| GL0066553 | - - - - -                                                                                                     |
| GL0600730 | - - - - -                                                                                                     |
| GL0297948 | - - - - -                                                                                                     |
| GL0489328 | - - - - -                                                                                                     |
| GL0507050 | - - - - -                                                                                                     |
| GL0875000 | - - - - -                                                                                                     |
| GL0417116 | - - - - -                                                                                                     |
| GL0772141 | - - - - -                                                                                                     |
