# Supplementary material for: Sequence and structure analyses of lytic polysaccharide monooxygenases mined from metagenomic DNA of humus samples around white-rot fungi in Cuc Phuong tropical forest, Vietnam
Source: PeerJ journal article supplement (doi:10.7717/peerj.17553), 2024-06-24
Supplement: Supplemental_Article_S3.pdf [file Supplemental_Article_S3.pdf]

Supplemental article S3. Results of N-terminal amino acid sequencing by Edman degradation method. A: Protein GL0247266; B: Protein GL0183513.

A

Raw Pmol Table

|   | ASP   | ASN   | SER   | GLN   | THR   | GLY          | GLU          | HIS          | ALA          | ARG   | TYR   | PRO   | MET          | VAL   | TRP   | PHE   | ILE   | LYS   | LEU   |
|---|-------|-------|-------|-------|-------|--------------|--------------|--------------|--------------|-------|-------|-------|--------------|-------|-------|-------|-------|-------|-------|
| 1 | 5.559 | 2.004 | 4.342 | 1.677 | 2.065 | 14.33        | 2.290        | <u>10.10</u> | 9.613        | 4.887 | 1.157 | 2.496 | 0.579        | 1.963 | 0.629 | 3.033 | 1.090 | 1.131 | 1.651 |
| 2 | 5.536 | 2.594 | 3.882 | 2.357 | 3.593 | <u>38.83</u> | 2.825        | 7.245        | 11.92        | 4.295 | 2.167 | 6.660 | 1.251        | 4.751 | 1.202 | 2.917 | 1.517 | 1.760 | 3.555 |
| 3 | 7.090 | 3.120 | 5.306 | 3.234 | 6.167 | <u>28.53</u> | 4.617        | 5.565        | <u>38.47</u> | 4.558 | 2.991 | 7.502 | 2.949        | 8.583 | 1.614 | 3.315 | 2.885 | 3.333 | 5.805 |
| 4 | 9.320 | 4.319 | 6.288 | 5.052 | 9.323 | 26.60        | 7.573        | 4.705        | <u>36.53</u> | 5.791 | 4.854 | 8.954 | <u>16.07</u> | 13.46 | 2.557 | 4.259 | 4.765 | 7.008 | 8.600 |
| 5 | 11.45 | 5.990 | 7.866 | 5.635 | 12.57 | 27.26        | <u>17.71</u> | 3.809        | 36.34        | 6.143 | 6.360 | 10.44 | 15.48        | 18.58 | 2.877 | 5.703 | 6.766 | 10.66 | 11.48 |

| Cycle | Residue  | Amino Acid |
|-------|----------|------------|
| 1     | blank    | -          |
| 2     | standard |            |
| 3     | 1        | H          |
| 4     | 2        | G          |
| 5     | 3        | A          |
| 6     | 4        | M          |
| 7     | 5        | E          |

B

Raw Pmol Table

|   | ASP   | ASN   | SER   | GLN          | THR   | GLY          | GLU   | HIS          | ALA   | ARG   | TYR          | PRO   | MET   | VAL   | TRP   | PHE   | ILE          | LYS   | LEU   |
|---|-------|-------|-------|--------------|-------|--------------|-------|--------------|-------|-------|--------------|-------|-------|-------|-------|-------|--------------|-------|-------|
| 1 | 6.600 | 2.470 | 6.652 | 1.408        | 6.130 | 91.47        | 2.852 | <u>35.93</u> | 5.576 | 13.60 | 2.327        | 15.34 | 0.782 | 1.893 | 0.751 | 1.997 | 0.933        | 1.215 | 2.347 |
| 2 | 7.266 | 5.994 | 5.027 | 5.643        | 6.450 | <u>142.7</u> | 6.761 | 11.94        | 16.35 | 9.932 | 9.488        | 20.15 | 0.283 | 8.095 | 0.692 | 6.066 | 4.307        | 4.956 | 7.349 |
| 3 | 10.98 | 11.52 | 12.90 | 9.562        | 8.581 | 67.45        | 9.996 | 7.426        | 23.38 | 10.22 | <u>108.7</u> | 21.20 | 0.292 | 18.96 | 1.966 | 12.31 | 15.59        | 11.44 | 12.97 |
| 4 | 18.24 | 14.88 | 13.65 | 17.16        | 12.37 | 47.33        | 18.65 | 6.572        | 33.20 | 16.15 | <u>53.39</u> | 24.59 | 1.247 | 29.66 | 3.438 | 19.95 | <u>102.5</u> | 17.17 | 15.62 |
| 5 | 30.49 | 16.88 | 14.32 | <u>68.94</u> | 14.85 | 41.70        | 29.98 | 6.504        | 40.37 | 15.81 | 32.65        | 26.90 | 1.577 | 36.26 | 4.266 | 24.38 | <u>58.26</u> | 19.29 | 19.00 |

| Cycle | Residue  | Amino Acid |
|-------|----------|------------|
| 1     | blank    | -          |
| 2     | standard |            |
| 3     | 1        | H          |
| 4     | 2        | G          |
| 5     | 3        | Y          |
| 6     | 4        | I          |
| 7     | 5        | Q, (D, E)  |
